# Supplementary material
Source: ML conference proceedings conference paper supplement (https://openaccess.thecvf.com/content/CVPR2025/html/Li_Multi-Sensor_Object_Anomaly_CVPR_2025_paper.html)
Supplement: Supplementary file 1 [file Li_Multi-Sensor_Object_Anomaly_CVPR_2025_supplemental.pdf]

# Multi-Sensor Object Anomaly Detection: Unifying Appearance, Geometry, and Internal Properties

## Supplementary Material

### A. Data Collection Details

As described in Sec 3.3 of the main text, the duration of thermal stimulation in Lock-in infrared thermography depends on the material properties and size of the objects. Objects with higher density and larger volume generally require a longer duration. This duration is controlled by two primary parameters: the lock-in period and the lock-in frequency. The lock-in period is responsible for the number of thermal stimulation, and the lock-in frequency determines the time intervals between each stimulation. Table A provides detailed information on the materials and dimensions of 15 objects, along with their respective lock-in periods and frequencies.

Table A. Properties and Thermal Stimulation Parameters of Objects

| Category         | Dimensions [mm] |       |        | Material        | Lock-in Period | Lock-in Frequency [Hz] |
|------------------|-----------------|-------|--------|-----------------|----------------|------------------------|
|                  | Length          | Width | Height |                 |                |                        |
| Capsule          | 20.0            | 8.0   | 8.0    | Gelatin         | 30             | 1.0                    |
| Cotton           | 80.0            | 80.0  | 1.0    | Fibre           | 30             | 1.0                    |
| Cube             | 100.0           | 100.0 | 10.0   | Plastic         | 30             | 0.2                    |
| Piggy            | 45.0            | 30.0  | 35.0   | Plastic         | 30             | 1.0                    |
| Screen           | 130.0           | 60.0  | 0.3    | Glass           | 30             | 1.0                    |
| Flat pad         | 16.0            | 16.0  | 0.5    | Metal           | 40             | 1.0                    |
| Screw            | 15.0            | 12.0  | 12.0   | Metal           | 60             | 1.0                    |
| Nut              | 15.0            | 15.0  | 5.0    | Metal           | 60             | 1.0                    |
| Spring pad       | 12.0            | 12.0  | 2.0    | Metal           | 40             | 1.0                    |
| Button cell      | 12.0            | 12.0  | 5.0    | Metal           | 50             | 1.0                    |
| Toothbrush       | 17.5            | 10.0  | 15.0   | Plastic         | 30             | 2.0                    |
| Zipper           | 250.0           | 26.0  | 1.5    | Fibre + Metal   | 30             | 1.0                    |
| Light            | 35.0            | 22.0  | 22.0   | Plastic + Metal | 90             | 0.5                    |
| Plastic cylinder | 30.0            | 30.0  | 10.0   | Nylon           | 60             | 1.0                    |
| Solar panel      | 40.0            | 40.0  | 3.0    | Silicon         | 30             | 0.2                    |

### B. More Dataset Samples

Due to page limit, only a few dataset samples are shown in the main text. To provide a more intuitive view of our dataset, below are additional dataset samples (Fig. A–I). Note that the first row represents the RGB image, the second row represents the infrared image, and the third row represents the point cloud. Each column represents a normal or abnormal sample.

### C. Implementation details

We employ two Transformer-based feature extractors to independently extract features from RGB/Infrared and point cloud data. For RGB/Infrared feature extraction, we use the ViT-B/8 model, which is pretrained on ImageNet with DINO. This model processes images resized to  $224 \times 224$  pixels and outputs 784 patch features per image. For point cloud feature extraction, we use the PointMAE, pretrained on the ShapeNet dataset. Outputs from layers 3, 7, 11 are used to

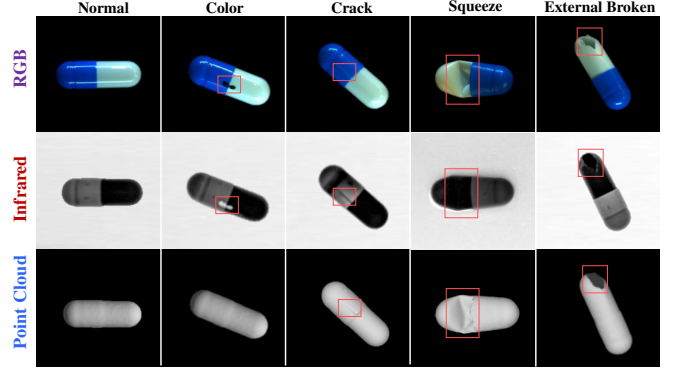

Figure A. Normal and abnormal **capsule** samples from the MulSen-AD Dataset.

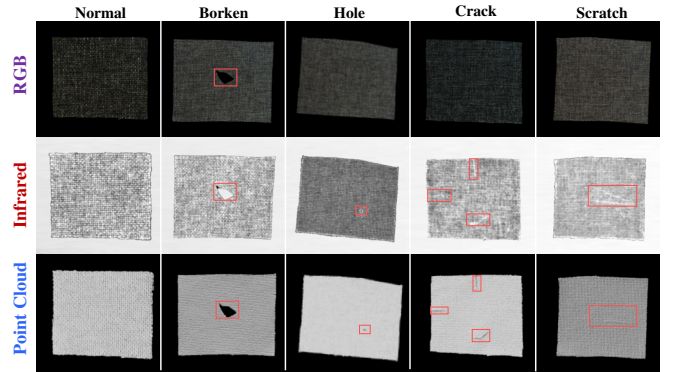

Figure B. Normal and abnormal **cotton** samples from the MulSen-AD Dataset.

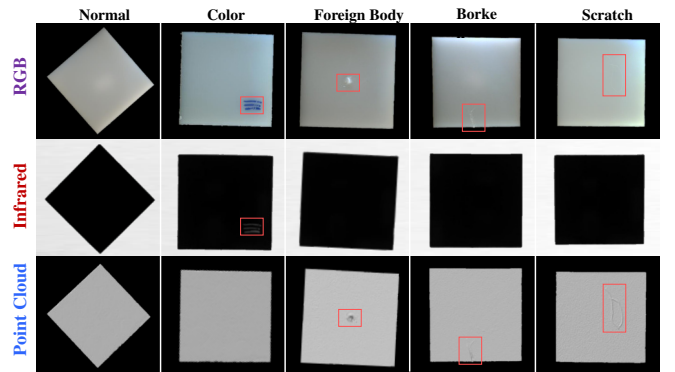

Figure C. Normal and abnormal **cube** samples from the MulSen-AD Dataset.

represent our 3D features. During training, we apply the AdamW optimizer with a learning rate set to 0.001, running the model for 200 epochs. All experiments are conducted on

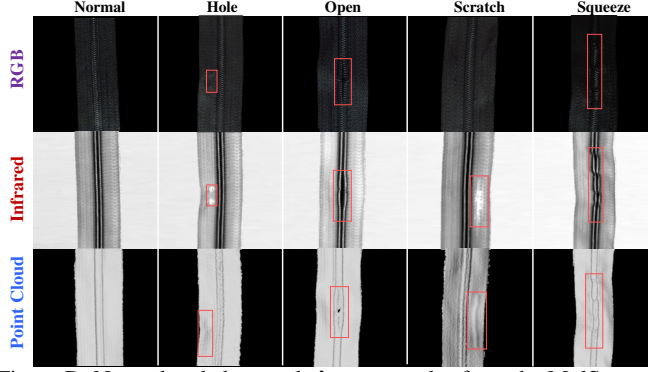

Figure D. Normal and abnormal **zipper** samples from the MulSen-AD Dataset.

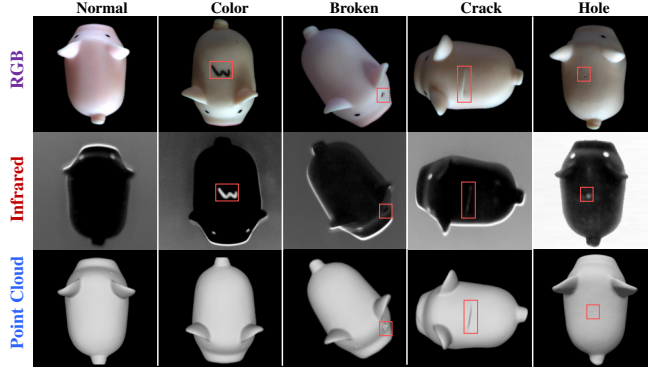

Figure E. Normal and abnormal **piggy** samples from the MulSen-AD Dataset.

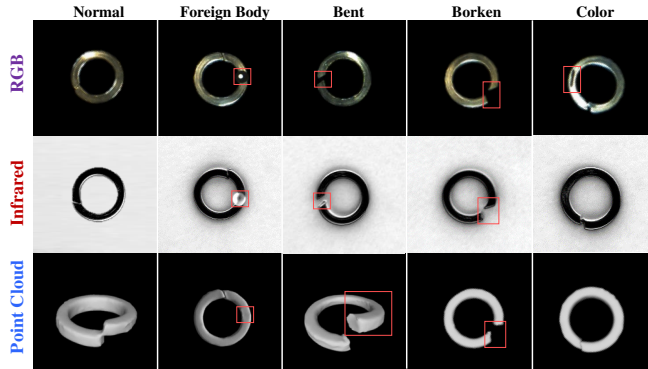

Figure F. Normal and abnormal **spring pad** samples from the MulSen-AD Dataset.

a Tesla V100 GPU.

#### D. Single 3D Benchmark

Due to the page limit, we only give the MulSen-AD Benchmark in the main text. Here we show the Single 3D Benchmark, including object-level Auroc in Table B, point-level Auroc in Table C. In the MulSen-AD setting, an object is labeled as abnormal if any one of the three modalities (RGB images, infrared images, or point clouds) is labeled as abnormal.

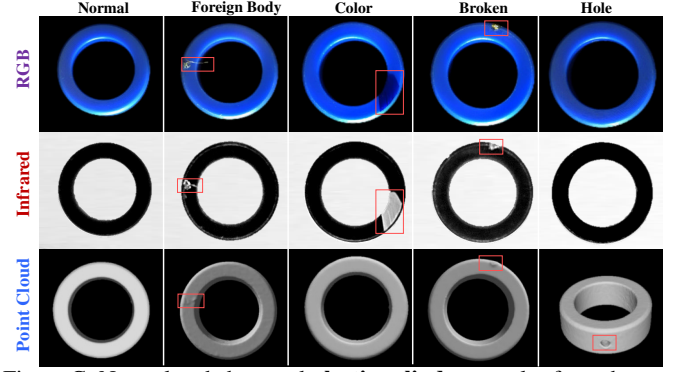

Figure G. Normal and abnormal **plastic cylinder** samples from the MulSen-AD Dataset.

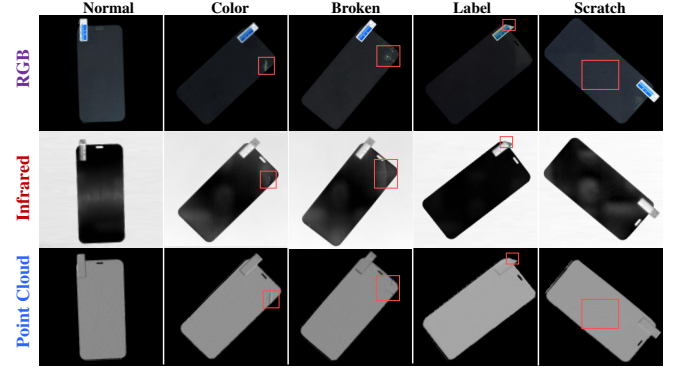

Figure H. Normal and abnormal **screen** samples from the MulSen-AD Dataset.

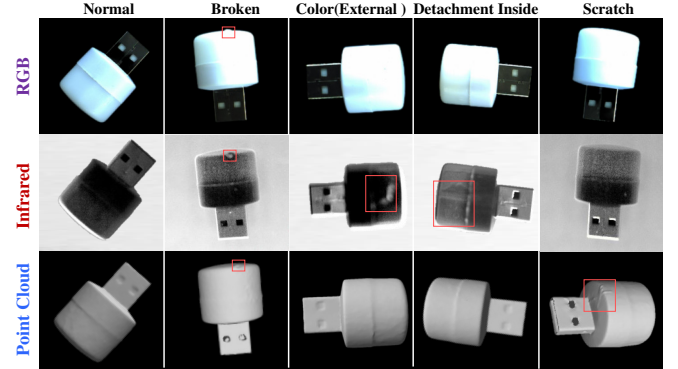

Figure I. Normal and abnormal **light** samples from the MulSen-AD Dataset.

mal. However, in the 3D-AD setting, an object is labeled as abnormal only if the point cloud specifically is labeled as abnormal.

#### E. Ablation Study on Memory Bank and Decision Unit Choices

This section presents the ablation study results for the memory bank and decision unit components. Specifically, we compare different choices for both components and their

Table B. SINGEBENCH-3D for MulSen-AD dataset. The score indicates object-level AUROC  $\uparrow$ . The best result of each category is highlighted in bold.

| Category         | BTF   |       | M3DM     |              | PatchCore    |              |              | IMRNet | Reg3D-AD     |
|------------------|-------|-------|----------|--------------|--------------|--------------|--------------|--------|--------------|
|                  | Raw   | FPFH  | PointMAE | PointBERT    | FPFH         | FPFH+Raw     | PointMAE     |        |              |
| Capsule          | 0.641 | 0.874 | 0.731    | 0.671        | 0.898        | 0.905        | 0.903        | 0.601  | <b>0.912</b> |
| Cotton           | 0.775 | 0.320 | 0.568    | <b>0.805</b> | 0.253        | 0.263        | 0.197        | 0.585  | 0.430        |
| Cube             | 0.603 | 0.655 | 0.463    | 0.458        | <b>0.723</b> | 0.668        | 0.722        | 0.432  | 0.569        |
| Spring pad       | 0.764 | 0.872 | 0.698    | 0.517        | 0.986        | <b>1.000</b> | 0.965        | 0.651  | 0.951        |
| Screw            | 0.764 | 0.872 | 0.663    | 0.955        | 0.979        | 0.931        | <b>0.997</b> | 0.742  | 0.972        |
| Screen           | 0.584 | 0.788 | 0.906    | 0.928        | 0.916        | <b>0.950</b> | 0.897        | 0.378  | 0.641        |
| Piggy            | 0.818 | 0.831 | 0.164    | 0.447        | <b>1.000</b> | 0.997        | 0.982        | 0.729  | 0.866        |
| Nut              | 0.789 | 0.883 | 0.783    | 0.751        | 0.971        | <b>0.989</b> | <b>0.989</b> | 0.812  | 0.797        |
| Flat pad         | 0.698 | 0.918 | 0.885    | 0.772        | <b>1.000</b> | 0.893        | 0.944        | 0.714  | 0.908        |
| Plastic cylinder | 0.728 | 0.866 | 0.462    | 0.706        | <b>0.941</b> | 0.908        | 0.936        | 0.621  | 0.765        |
| Zipper           | 0.505 | 0.662 | 0.701    | 0.698        | 0.797        | <b>0.813</b> | 0.739        | 0.630  | 0.470        |
| Button cell      | 0.567 | 0.500 | 0.549    | 0.659        | <b>0.915</b> | 0.687        | 0.797        | 0.702  | 0.782        |
| Toothbrush       | 0.882 | 0.562 | 0.803    | 0.901        | <b>0.905</b> | 0.888        | 0.891        | 0.615  | 0.812        |
| Solar panel      | 0.474 | 0.531 | 0.385    | 0.395        | 0.624        | 0.605        | 0.612        | 0.344  | <b>0.660</b> |
| Light            | 0.903 | 0.859 | 0.579    | 0.653        | 0.975        | <b>1.000</b> | 0.992        | 0.457  | 0.897        |
| Mean             | 0.711 | 0.721 | 0.628    | 0.705        | <b>0.860</b> | 0.833        | 0.840        | 0.601  | 0.749        |

Table C. SINGEBENCH-3D for MulSen-AD dataset. The score indicates point-level AUROC  $\uparrow$ . The best result of each category is highlighted in bold.

| Category         | BTF   |              | M3DM     |              | PatchCore |              |              | IMRNet | Reg3D-AD     |
|------------------|-------|--------------|----------|--------------|-----------|--------------|--------------|--------|--------------|
|                  | Raw   | FPFH         | PointMAE | PointBERT    | FPFH      | FPFH+Raw     | PointMAE     |        |              |
| Capsule          | 0.639 | 0.917        | 0.777    | 0.753        | 0.917     | 0.919        | <b>0.921</b> | 0.423  | 0.877        |
| Cotton           | 0.412 | 0.581        | 0.663    | <b>0.699</b> | 0.554     | 0.546        | 0.528        | 0.507  | 0.521        |
| Cube             | 0.441 | <b>0.803</b> | 0.613    | 0.710        | 0.575     | 0.437        | 0.417        | 0.566  | 0.626        |
| Spring pad       | 0.659 | 0.780        | 0.568    | 0.652        | 0.629     | 0.601        | 0.621        | 0.401  | <b>0.802</b> |
| Screw            | 0.577 | 0.582        | 0.453    | 0.443        | 0.578     | <b>0.610</b> | 0.597        | 0.456  | 0.540        |
| Screen           | 0.469 | <b>0.612</b> | 0.529    | 0.567        | 0.609     | 0.587        | 0.532        | 0.352  | 0.466        |
| Piggy            | 0.735 | <b>0.871</b> | 0.617    | 0.572        | 0.848     | 0.624        | 0.603        | 0.512  | 0.635        |
| Nut              | 0.640 | <b>0.924</b> | 0.631    | 0.687        | 0.903     | 0.896        | 0.897        | 0.369  | 0.807        |
| Flat pad         | 0.604 | <b>0.715</b> | 0.626    | 0.583        | 0.707     | 0.678        | 0.630        | 0.542  | 0.692        |
| Plastic cylinder | 0.662 | <b>0.858</b> | 0.510    | 0.652        | 0.830     | 0.766        | 0.769        | 0.412  | 0.670        |
| Zipper           | 0.390 | 0.532        | 0.496    | <b>0.563</b> | 0.552     | 0.545        | 0.502        | 0.496  | 0.536        |
| Button cell      | 0.671 | 0.694        | 0.797    | <b>0.799</b> | 0.382     | 0.512        | 0.478        | 0.485  | 0.706        |
| Toothbrush       | 0.471 | <b>0.634</b> | 0.501    | 0.386        | 0.605     | 0.604        | 0.606        | 0.519  | 0.472        |
| Solar panel      | 0.536 | <b>0.727</b> | 0.539    | 0.601        | 0.202     | 0.265        | 0.274        | 0.533  | 0.609        |
| Light            | 0.665 | <b>0.710</b> | 0.480    | 0.495        | 0.707     | 0.706        | 0.696        | 0.415  | 0.651        |
| Mean             | 0.571 | <b>0.729</b> | 0.587    | 0.611        | 0.640     | 0.620        | 0.605        | 0.467  | 0.641        |

| Memory Bank      | Decision Unit        | AUROC( $\uparrow$ ) |
|------------------|----------------------|---------------------|
| GMM              | OC-SVM               | 0.795               |
| PatchCore        | KNN                  | 0.951               |
| PatchCore        | LOF                  | 0.939               |
| PatchCore        | IsolationForest      | 0.744               |
| <b>PatchCore</b> | <b>OC-SVM (Ours)</b> | <b>0.961</b>        |

Table D. Ablation study results for memory bank and decision unit, measured by object-level AUROC.

impact on the performance. For the memory bank, we compare PatchCore’s method with traditional Gaussian Mixture Model (GMM) modeling. In the decision unit section, we evaluate three different algorithms: K-Nearest Neighbors

(KNN), Local Outlier Factor (LOF), and Isolation Forest (IF). The results, summarized in Table D, highlight the significance of selecting the appropriate methods for both components. Notably, **our approach, combining PatchCore with OC-SVM, delivers the best performance.**

**Potential negative social impacts.** Our dataset was collected with permission from the factory, so no negative social impact will exist.
